# Supplementary material for: Assessing transient changes in the ocean carbon cycle during the last deglaciation through carbon isotope modeling
Source: Copernicus journal article supplement (doi:10.5194/egusphere-2023-2526), 2023-11-13
Supplement: Supplementary file [file egusphere-2023-2526-AC2-supplement.pdf]

## Response to Reviewer 2

The authors greatly appreciate the insightful feedback from the reviewer. We have incorporated all the recommended changes detailed below (comments in blue are extracted from the reviewer's feedback; text in italic font represents excerpts from the revised manuscript). We also appreciate the helpful comments regarding the structure of the manuscript, which we have amended to improve coherence between sentences. Additionally, the comments regarding the figures were highly informative, and we have taken the necessary steps to improve their clarity.

The manuscript presents results of a transient simulation of the last deglaciation with an ocean carbon model forced with MIROC4m outputs (from Obase and Abe-Ouchi, 2019). The authors assess the simulated  $p\text{CO}_2$ ,  $\delta^{13}\text{C}$  and  $\Delta^{14}\text{C}$  variations between 21 and 11 ka, in response to AMOC changes – in particular an abrupt increase at the onset of the Bølling-Allerød and Holocene and an abrupt decrease for the Younger Dryas. Using model-data comparison for both  $\delta^{13}\text{C}$  and  $\Delta^{14}\text{C}$  and a decomposition analysis of the  $p\text{CO}_2$  changes, they are able to discuss to some extent the processes behind the large glacial-interglacial  $\text{CO}_2$  variations recorded in ice cores, also building on Kobayashi et al. (2021) results. The observed model-data (mis)matches for  $\delta^{13}\text{C}$  and  $\Delta^{14}\text{C}$ , which can differ, are informative in terms of processes and could pave the way for further modelling efforts targeting the last deglaciation.

Thank you for summarizing the main aspects of our manuscript. We appreciate your encouragement regarding our transient simulation during the last deglaciation and your recognition of the insights gained from the model-data comparisons.

I think that this study is well-suited for *Climate of the Past* and that the simulation, results, and analysis presented in the article are all worthy of

publication. Overall, the manuscript is well-written, although there are places where the writing style and flow could be improved for the reader to follow more easily the scientific reasoning of the authors. To give this study more weight, I also think that the authors should not shy away from underlining more its strengths in a number of instances, explicitly connecting an important research question to a demonstrated knowledge gap; as well as its weaknesses, hopefully providing for a clearer path forward for modelers interested in this question. I am providing below a number of points to help guide the authors in this direction. Since most of my comments are suggestions of improvement of the writing style/flow/clarifications, I recommend publication after minor revisions.

Thank you for your thoughtful review and positive assessment of the suitability of our study for publication in *Climate of the Past*. We appreciate your feedback on improving the readability and scientific integrity of the manuscript. We have carefully considered your suggestions to strengthen the links between the research questions and identified knowledge gaps. Our revision focused on improving the writing style and addressing weaknesses to ensure clearer comprehension by other modelers interested in this subject area. Your guidance was instrumental in helping us refine our work, and we have incorporated your suggestions to improve the manuscript prior to its submission.

### General comments:

1. Abstract structure: The abstract starts out very abruptly with some of the methods (L1) and technical details (L2). I think that delineating the overall subject, why it matters, knowledge gaps and an explicit scientific question should come first for the reader to clearly understand the scientific reasoning behind the study. What is the scientific problem? Why is it chosen? Which methods are (thus) proposed to tackle it? Some knowledge gap can be found right at the end of the abstract (L22-23), introduction

(L47-51) or in the discussion (L273-277). Methodological elements are scattered in the abstract (L1-3, L7, L11, L19). I would recommend rearranging all of these elements so that the reader is not given the impression of a list of results, but of a logical approach to tackle an outstanding problem.

We appreciate this valuable feedback regarding the structure of the abstract. The abstract in the revised manuscript has been completely restructured based on your advice.

2. Introduction and study originality: Although the introduction has a clearer structure, I think that it lacks – like the abstract: (1) a clear explanation of the stakes (why is understanding these processes key?); (2) explicit connections between the limitations of previous studies (defining a knowledge gap), a scientific question, and the methods therefore chosen to tackle it. Without these elements, it is difficult for the reader to see the originality (asset, novelty) of this study.

We have incorporated this feedback and completely revised the Introduction section. We paid particular attention to the transitions and reorganized the text to create better connections between paragraphs.

3. Transitions: throughout the manuscript, there is a lack of transitions in-between paragraphs. This slows down reading as the reader has to stop and think about how the new idea is related to the previous one. There are parts (e.g. Discussion) where this absence of transition (and therefore of clear structure) makes the reader a bit lost. I would recommend using more link words (of other types of explicit connections) to make the reasoning more visible (and therefore easier to follow). I have underlined a few examples in the specific comments for guidance.

We appreciate your valuable advice. We have revised the text with particular attention to transitions and we noted these points in the English

proofreading submission.

4. Limitations: Neither the consequences of using a fixed ocean volume (L123-125) and restoring term for carbon isotopes (L126-129) are discussed in Sect 4.3. Such a discussion would be welcomed. Indeed, Sect. 4.3 “Implications for future improvements to the model and experimental design” discusses in length potential model developments, but not much the improvements which could be made to the experimental design. However, both Snoll et al. (in review, 2023) and Bouttes et al. (2023) have demonstrated the influence of the choice of forcings (respectively, freshwater fluxes and interactive bathymetry) on model results. Perhaps describing potential improvements in terms of experiment design as well could help identify a clearer way forward (I mean some kind of shorter term strategy, as Sect. 4.3 and the conclusion are both sending off a rather vague “we need to improve models” message – which is relevant, but in large part a long term endeavor).

In Section 4.3 of the revised manuscript, we discuss the impact of the use of fixed ocean volume and the restoring term for carbon isotopes on our results. Additionally, we discuss potential improvements in the experimental design based on the influence of forcings, considering the works by Snoll et al. (in review, 2023) and Bouttes et al. (2023). Both studies highlight that the choice of forcings, specifically freshwater fluxes and interactive bathymetry, has major impact on the time-series of the AMOC and associated climate changes. Nevertheless, our experimental design has the advantage of examining climate responses associated with abrupt climate changes (such as the Bølling-Allerød and Younger Dryas transitions) with minimal adjustment to freshwater. We acknowledge that there is uncertainty in the choice of climate forcing, and we recognize that improving the experimental design (such as incorporating interactive bathymetry and associated ocean volume changes) might influence the climate fields or the oceanic carbon content. We plan to address these factors in our future

studies.

5. Tense: I think that the past (e.g. L3, L8, L9... and throughout the manuscript) and past perfect (e.g. L20, L22...) tense tend to make statements less effective than present tense.

We have edited and proofread the English text, carefully considering the impact of sentence structure in different tenses. We understand that it is customary to use the past tense when referring to our “study” because the reference is to work that was undertaken as part of the research effort (e.g., in the account of the study in the abstract and in the description of the research method in the Methods section). Descriptions regarding the content of the “paper,” i.e., discussion of the results derived from the research effort of study, have been revised to the present tense.

Specific comments:

L5 and L7: “increased”, “decreasing trend”. By how much? More frequent quantification would be welcomed.

Thank you for your feedback. We have revised the abstract by incorporating more quantitative information.

L12-13: “We found that...”. This statement seems to be contradictory with Fig. 2, unless “after the onset of the BA” is specified.

We have revised the abstract to address this concern. The text has been amended to mention changes in the AMOC after the onset of the Bølling-Allerød period.

L17-18: “smaller atmospheric pCO<sub>2</sub> changes than ice core data”. Are you referring to changes during HS1 or during the whole deglaciation?

This statement refers to changes during Heinrich Stadial 1. We have restructured the abstract to make this aspect clearer.

L26-27: the “which is” proposition interrupts the “from … to…” statement, giving a jerky rhythm to the sentence.

We have revised the sentence to ensure smoother flow and improved clarity.

L31: An example of where a transition (e.g. “To decipher the reasons behind those changes,…” ) would be welcomed. Same for L34 (e.g. “In particular,…” , with no line jump).

Thank you for highlighting the need for smoother transitions. We have incorporated these suggestions into the revised manuscript.

L37: “Therefore” provides for an incomplete argument for different  $\delta^{13}\text{C}$  in water masses, for only the impact of fractionation during photosynthesis is described before – not including the impact of ventilation on the isotopic signal.

We have added the following statement to the revised manuscript.

*“Anomalies in the stable carbon isotope signature ( $\delta^{13}\text{C}$ ) produced by the biological carbon pump spreads globally following the deep ocean circulation.”*

L54: Are you using the plural form to designate both the soft tissue and the carbonate pumps combined? According to Kohfeld and Ridgwell (2009), strictly speaking, the biological pump (singular) encompasses both.

Thank you for this feedback. We have revised the manuscript to use the singular form “*biological pump*” in accordance with Kohfeld and Ridgwell (2009).

L55-59: I find the explanation of the limitations of the use of steady-state differences (and therefore, of the asset of using transient simulations) to be incomplete and therefore only partially convincing. Could you elaborate?

The revised manuscript includes information on the benefits of transient climate modeling over steady-state modeling, thereby underscoring the motivation behind our study.

*“Transient climate modeling has distinct advantages: it avoids unrealistic equilibrium assumptions and includes climate responses to internal variability or abrupt changes. It also facilitates direct comparisons between models and proxies, allowing us to identify time leads or lags in the process with respect to forcing.”*

Steady-state differences tend to overestimate the impacts of processes operating on time scales of thousands to tens of thousands of years. For example, in our study (Kobayashi et al., 2021, *Sci. Adv.*; K21), we performed numerical integrations over hundreds of thousands of years to explore the steady-state response of carbonate sediments. However, because actual glacial-interglacial cycles and their transitions occur on shorter time scales, this approach might overestimate the realistic response. To better understand realistic processes, it is critical to examine the carbon cycle response that occurs within the transitions of climate change.

L59: The change of tense (“will improve” to “have been conducted”) makes it confusing for the reader to understand what exactly is the knowledge gap, and what is new in this study with respect to previous studies.

Thank you for highlighting this issue. We have rephrased the wording to clarify the knowledge gap and to express the novelty of our study in comparison to previous research.

Previous studies using Earth Systems Models of Intermediate Complexity

(EMIC) have focused on atmospheric CO<sub>2</sub> fluctuations during glacial–interglacial cycles, consistent with ice core records. However, this approach has limitations such as overreliance on parameterized processes and poor comparison with observed sediment core records. Our research aims to fill this gap through numerical experiments on the ocean carbon cycle during the last deglaciation. We performed detailed model–data comparisons of carbon isotope ratios with recently compiled sediment core records to validate the simulated ocean carbon cycle changes, and to discuss possible biases and missing or underestimated processes in the model.

L66 and L71: the lack of transition with “other related studies”, “several related studies” makes it difficult to follow the reasoning and understand where this paragraph is going. I would recommend connecting ideas rather than juxtaposing them.

We reorganized the paragraphs to create smoother transitions between ideas. The connections between “*other related studies*” and “*several related studies*” are now more clearly established, thereby improving the flow of the argument within the paragraph.

L71–75: this sentence contains many processes and seem therefore very long. Could it be divided into two? As for the references L75–76, it is unclear whether they refer to either one, or all, of the mentioned processes.

Following the advice, we have revised the sentence and split it into two for improved readability. Changes related to this issue are also reflected in our response to the previous feedback. The referenced studies broadly suggest that Southern Ocean processes are important regarding the rise in atmospheric pCO<sub>2</sub> during the last deglaciation. We have rewritten the relevant text in a more general sense and we have cited the references accordingly.

L78–80: it seems unclear to me (1) what were the conclusions of those



previous studies, (2) what is their limitation you are mentioning, and therefore (3) the novelty brought by your study. Could you elaborate?

The conclusions that can be drawn from the previous studies are summarized in the following.

(1) EMIC studies have conducted numerical experiments focusing on the changes in atmospheric CO<sub>2</sub> resulting from variations in oceanic and terrestrial carbon cycling during glacial–interglacial cycles or focusing on Heinrich Stadial 1. Some studies have successfully explained the amplitude of atmospheric CO<sub>2</sub> aligned with ice core records.

However, these studies are limited in respect to the following point.

(2) Although such results are an important advance, a large proportion of the amplitude is explained by the parameterized processes. Factors controlling temperature–dependent decomposition of organic matter, iron fertilization, CO<sub>2</sub> from hydrothermal venting, or gradual changes in meltwater and westerly wind strength are imposed. Furthermore, although these models reproduce changes in atmospheric CO<sub>2</sub> consistent with ice core records, comparisons of model output with observational sediment core records remain inadequate. These comparisons typically focus on one-dimensional vertical distributions of basin averages and lack detailed comparisons across different time slices of deglaciation.

In our study, we aimed to address this limitation.

(3) In this study, we performed numerical experiments on the ocean carbon cycle under deglacial climate changes derived from a climate model. We present model–data comparisons of carbon isotope ratios with recently compiled sediment core records for different time periods. We validate the simulated ocean carbon cycle changes and discuss possible biases and missing or underestimated processes in the model by comparing simulated

carbon isotope ratios with sediment core data.

Discussion of both the limitations of previous studies and the developments of this study is presented in the Introduction section of the revised manuscript.

L90: “boundary conditions” is a rather technical jargon which, depending on the model setup, can designate various things. I would prefer using “was forced with” instead.

Following the advice, the revised manuscript replaces the phrase “*boundary conditions*” with “*is forced with*” in several instances to improve the clarity of the text.

Sect. 2.2: A little surprisingly, the PMIP4 protocol (Ivanovic et al., 2016) is not mentioned. It could be worth noting whether the AOGCM simulation by OA19 followed the PMIP4 protocol for deglacial simulations, and if not, where it differed.

Reviewer #1 also made a similar comment. Section 2.2 of the revised manuscript provides a description of the MIROC-AOGCM experimental setup, identifying the components that follow the PMIP protocol (Ivanovic et al., 2016) and any subsequent modifications.

L106: Without reading the quoted paper, these values and how they were chosen seem a little mysterious.

The following description regarding the iron cycle model used in this study has been added to the revised manuscript.

*“The iron solubility is derived from the ratio of wet and dry dust deposition and its solubility. Note, however, that there is some uncertainty associated with these parameters.”*

L115: Please give out here a quantified value of the pCO<sub>2</sub> simulated in the 2021 paper. Same in L162. The authors could also consider adding a triangle for this value in Fig. 2k.

We have added the quantified values of atmospheric pCO<sub>2</sub> simulated by K21; the triangles in Fig. 2k indicate specific pCO<sub>2</sub> values calculated by K21.

L124: Ocean volume change would also induce changes in alkalinity and nutrients, not only dissolved matter concentration.

As you correctly noted, changes in ocean volume can also lead to changes in alkalinity and nutrient concentrations. We have modified the sentence in the revised manuscript as follows: *“Notably, the transient experiment does not account for temporal variations in ocean volume caused by ice sheet changes and associated changes in mean ocean concentration of biogeochemical tracers (i.e., nutrients, alkalinity, and DIC).”*

L142: “underestimates”. As the simulated values are less negative than the reconstructed ones, I am unsure whether “underestimates (how low these values are)” or “overestimates” should be used. This English vocabulary should be checked.

We have revised the description to clarify the meaning.

*“Notably, however, the simulated  $\Delta\Delta^{14}C$  values are less negative than the reconstruction of  $\Delta\Delta^{14}C$  at 21 ka BP in the Atlantic below 3000 m and in the Pacific below 2000 m.”*

L155: “approximately 80 ppm”. The value here is lower than the one chosen L28. It is best to use consistent numbers.

Thank you for highlighting this point. Throughout the revised manuscript, we use the value of *“approximately 80 ppm”* to represent the deglacial

change in atmospheric pCO<sub>2</sub>.

L156 and L161: “One possible explanation” / “Another possible explanation”. This vocabulary may give the reader the impression that these reasons are mutually exclusive, which is not the case.

As you correctly identified, these processes are not mutually exclusive and both can contribute. We have revised this text to indicate that these processes are not exclusive.

L172: “at times”. Could you specify which times? and why?

This description refers to the trend of  $\Delta \Delta^{14}\text{C}$  throughout the last deglaciation. The  $\Delta \Delta^{14}\text{C}$  in the deep ocean tends to gradually approach zero from the markedly negative values during the LGM. Variations in the deep ocean circulation disrupt this prominent trend.

*“Seawater  $\Delta \Delta^{14}\text{C}$  generally increases from the relatively low LGM values, but decreases during HS1 and the YD.”*

L175-178: This sentence brings very little new elements with respect to L174-175 (except the numerical value of -200 permil).

In acknowledgment of your observation, we have summarized the second half of this paragraph to avoid repetition.

L180-181: The link between the AMOC and the deep Pacific ventilation is unclear.

In this study, the volume transport of AABW increases during periods of intensified AMOC, such as the Bølling–Allerød period and the Holocene, which reduces  $\Delta \Delta^{14}\text{C}$  in the Southern Ocean. This change is relatively small in the Pacific Ocean, excluding the Southern Ocean. This characteristic of

ventilation change might depend on the model and the background climate.

L183: “do not provide clear indication of the intrusion of young water masses”. Where is this evidence? Please quote a figure number.

Figures 3 and S4 show the evidence for the statement “*do not provide clear indication of the intrusion of young water masses*”. For clarity, we have quoted the figure numbers.

L184-185: “whereas the model experiment does not show such pronounce change [during HS1]”. I find this statement to be slightly misleading, for I would expect that the absence of a large increase of simulated  $\Delta^{14}\text{C}$  to be related not to a model error during HS1, but to the very high values (wrt. reconstruction) inherited from the initial state (i.e. not enough carbon sequestration in the ocean at the LGM).

Your point is quite valid. The differences between the model and the data during the early deglaciation are strongly influenced by the state of the carbon cycle inherited from the LGM; consequently, we have revised the relevant sentences.

L188: “ $\Delta^{14}\text{C}-\text{CO}_2$  (Fig. 2a)”. Please explain this choice of plot.

The intention is to show changes in atmospheric  $\Delta^{14}\text{C}-\text{CO}_2$  attributable both to changes in the ocean carbon cycle and to exchange between the atmosphere and the ocean.

L190-195: This paragraph feels disconnected from the previous descriptions. A transition would probably help integrate it explicitly in the reasoning.

Thank you for pointing out the need for better integration in the text. We have revised this paragraph to ensure a smoother transition that explicitly aligns with the preceding descriptions:

*“Regarding the latter point of insufficient carbon sequestration during the LGM, the triangles shown in Fig. 2 represent the results of the best LGM simulation (LGM\_all) conducted by Kobayashi et al. (2021).”*

L200: Could we perhaps see a figure of biological production as well in Supplementary?

We show a figure illustrating the changes in biological production from the LGM in Supplementary Fig. S6.

L199-201: How is a reduced vertically gradient in response to a stronger AMOC related to the sensitivity of  $\delta^{13}\text{C}$  to climate change?

In this model, the basin-scale distribution of  $\delta^{13}\text{C}$  changes completely during the first 500 years or so when the AMOC changes from a weak state to a strong state. Given the time scales of ocean circulation, this result is not that surprising. Although we have not looked closely at the results of other models, it is possible that this response might vary on somewhat different time scales owing to counteracting action of the biological pump and to changes in terrestrial vegetation.

L204-206: The reasoning seems incomplete. How should we interpret this different model-data agreement for the North Atlantic / Southern Ocean?

During Heinrich Stadial 1,  $\delta^{13}\text{C}$  decreases gradually in the upper 3000 m of the North Atlantic (Figs. 2h, 4, and S3). The reduction in  $\delta^{13}\text{C}$  can be attributed to several factors that include an increased contribution from southern-sourced deep water with low  $\delta^{13}\text{C}$  endmembers, accumulation of remineralized carbon with low  $\delta^{13}\text{C}$  owing to a weakened AMOC and reduced ventilation, and increase in the  $\delta^{13}\text{C}$  endmember of the North Atlantic Deep Water (NADW) (Gu et al., 2021). In this study, no obvious change in the endmember of the NADW was observed. The  $\delta^{13}\text{C}$  change is attributed to weakening of the ventilation in the North Atlantic and to

expansion of southern-sourced deep water.

In the deep Southern Ocean,  $\delta^{13}\text{C}$  is lowest during the LGM and gradually increases during Heinrich Stadial 1. Such changes were not observed in the model. K21 explain the low  $\delta^{13}\text{C}$  during the LGM by considering the enhanced Southern Ocean stratification and iron fertilization from glaciogenic dust, which lower  $\delta^{13}\text{C}$  in the deep water. The absence of these processes is one factor explaining the difference between the model and the data.

The different model-data agreement between the North Atlantic and the Southern Ocean raises questions about the mechanisms governing the response of these regions to climate change. Further investigation is needed to fully interpret the disparity in model-data agreement and to better understand the different influences shaping  $\delta^{13}\text{C}$  dynamics in these specific oceanic zones. We have made revisions in the text with this specific point in mind.

L207: “the AMOC is intensified”. Add “and deepens”.

We have modified the text following your suggestion.

Sect 3.3.2 and 3.3.3: Like in Sect 3.3.1, I would welcome here a quantification of the atmospheric  $\text{pCO}_2$  changes occurring during the BA and YD.

Sections 3.3.2 and 3.3.3 present specific quantitative data regarding changes in atmospheric  $\text{pCO}_2$  during the Bølling-Allerød and Younger Dryas periods. The calculated changes in atmospheric  $\text{pCO}_2$  are as follows.

Heinrich Stadial 1 (18–15 ka BP): increase in atmospheric  $\text{pCO}_2$  by 10.2 ppm;  
Bølling-Allerød period (15–13 ka BP): decrease in atmospheric  $\text{pCO}_2$  by 7.0 ppm;  
Younger Dryas period (13–12 ka BP): increase in atmospheric  $\text{pCO}_2$  by

6.8 ppm.

L260: “the AMOC resumes over time”. This feels like an inaccurate description of the AMOC variations, as Fig. 1 rather shows a stabilization during the BA after an overshoot at the onset of the BA.

The description of the AMOC has been revised to better reflect the fact that the post-overshoot stabilization phase of the AMOC coincides with the observed net increase in global biological production in the global ocean.

L280: “after the BA transition are generally consistent”. Starting out this paragraph like this is a bit surprising (in terms of chronology), as this statement does not acknowledge the large model-data gap before the BA transition.

The revised manuscript is written in chronological order. After highlighting the major differences in  $\Delta \Delta^{14}\text{C}$  during Heinrich Stadial 1, we discuss the changes that occurred after the Bølling-Allerød transition.

L293: “a longer period”. Please quantify the difference. The forcing in terms of meltwater fluxes also seem to differ between the two studies.

These differences in duration have been clarified. The duration of the minimum AMOC during the Younger Dryas period is approximately 1000 years in our model, whereas it is approximately 500 hundred years in the Bern3D model. Moreover, the strength of the AMOC during the Younger Dryas period is approximately 4 Sv in our model and approximately 6 Sv in the Bern3D model.



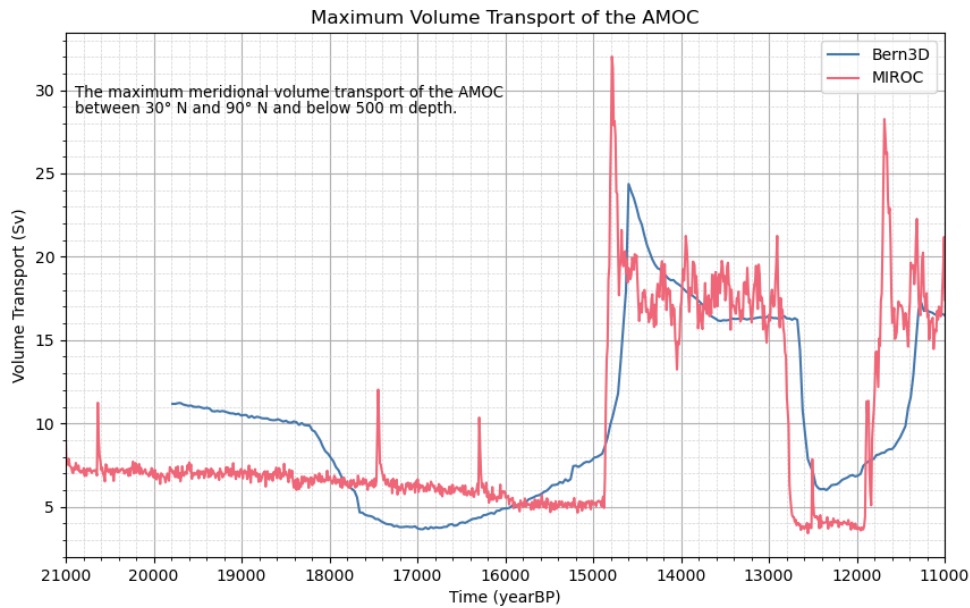

L297-300: Although this seems like conclusive remarks, I am not coming out of the paragraph with a clear idea of what the comparison to the Pöppelmeier et al. (2023) results actually brought to the table. Clarifying the transition (L286, L301) could help.

Thank you for highlighting this area of concern. To more clearly express the comparison with the results of Pöppelmeier et al. (2023), we have revised the transition of these sentences.

Additionally, the descriptions of these lines that were noted have been moved to the Conclusions section.

L303: “to the deep ocean”. Do you mean deep Atlantic ocean? This mismatch seems larger in the Atlantic than Southern Ocean.

As you correctly identified, the difference is most noticeable in the North Atlantic Ocean, which is greatly affected by NADW inflow. This sentence was a repeat of the previous sentence, and it has been removed because it was redundant.

L312-313: Could you specify? As such, this is an underwhelming statement.

Thank you for pointing this out. The description has been changed to specifically explain the factors that cause  $\delta^{13}\text{C}$  variation.

*“For  $\delta^{13}\text{C}$ , both the model and data show a similar, depicting an increase in deep water  $\delta^{13}\text{C}$  during the BA as in  $\Delta\Delta^{14}\text{C}$ . However, there is a discrepancy during the following YD period. The model indicates a decrease in deep water  $\delta^{13}\text{C}$  during the YD, whereas this feature is absent in the reconstruction (Figs. 2g--j). There are several possible factors that could potentially influence this discrepancy. Variations in change signals and potential dating inaccuracies within individual sediment core data can result from smoothing effects such as bioturbation and coring artifacts. These complexities highlight the need for caution when comparing model simulations and sediment core records. Another important factor is the weakening of the simulated AMOC during the YD. The comparison of the model and sediment data for  $\Delta\Delta^{14}\text{C}$  and  $\delta^{13}\text{C}$  suggests that the weakening of the AMOC during the YD may be overly pronounced in the model (Figs. 3e and 4e). In addition, the calculated increase in export of biogenic organic matter in the Southern Ocean during the YD compared to the BA (Figs. S6f and g) contributes to the decrease in  $\delta^{13}\text{C}$  in the deep ocean. This emphasizes the importance of accurately simulating nutrient and iron cycles, especially in iron-limited regions affected by changes in dust-derived iron supply. As the Southern Hemisphere warms and becomes more humid, the supply of iron from dust may decrease (Martin, 1990; Martínez-García et al., 2014). Reproducing changes in  $\delta^{13}\text{C}$  is challenging due to the intricate interconnections between ocean circulation, biological processes, and atmosphere-ocean gas exchange. Understanding the discrepancies between the model and data in  $\delta^{13}\text{C}$  changes requires future sensitivity experiments to clarify their respective contributions and provide a deeper understanding of these factors.”*

L321: “AMOC weakening” could be changed to “AMOC weak state”, since the actual weakening occurs at the onset of these events.

We have corrected it as indicated. Atmospheric pCO<sub>2</sub> increases when the AMOC is in the weak state.

L323: Shouldn't the contribution of SST during YD and HS1 also be mentioned?

In response to your question, we have modified the wording to emphasize that the major factors of changes in atmospheric pCO<sub>2</sub> in response to the AMOC fluctuations are alkalinity and SST changes.

L325: Could we perhaps see a figure with the vertical gradients in Supplementary?

We have added figures showing the changes in surface and deep DIC and alkalinity in the Atlantic and Pacific oceans to the Supplementary Figures.

L327: “increased SST and reduced surface ocean alkalinity”. During which part(s) of the deglaciation specifically? Or do you mean the whole deglaciation?

The changes in “increased SST and decreased surface ocean alkalinity” are specific to the intervals of Heinrich Stadial 1 and the Younger Dryas period during the deglaciation.

L329: The absence of transition is more notable as we go back in time (reversed chronology here). L332: “In contrast” seems like the wrong link word here.

Thank you for bringing this to our attention. We have revised the text of the Discussion section, including improving transitions to create smoother flow.

L350-351: “AOGCM of MIROC”, “EMIC of iLOVECLIM”. The model classification is irrelevant here. The difference in model resolution could be mentioned if the authors would like to propose it as a potential cause for the observed model difference (although difference in forcings could also play a role).

As you correctly highlighted, the paper compares two coupled climate models with different responses to freshwater input and therefore the classification of the models is not essential. The description has been modified accordingly in the revised manuscript.

L420: Add something like “at the BA and YD transition respectively”

We have added the words that you have suggested.

*“To understand the mechanisms of glacial--interglacial variability in the carbon cycle, this study examines the transient response of the ocean carbon cycle to climate change, including the remarkable strengthening and weakening of the AMOC at the BA and YD transition respectively.”*

L422: “relatively modest”. Please quantify again.

We have added information regarding quantitative changes in atmospheric pCO<sub>2</sub>.

Fig. 1: (a) Please specify in the legend what the metric used for the AMOC strength (max at 26°N?). Also, you could consider adding triangles for the Kobayashi et al. (2021) values as in Fig. 2.

The legend of the revised manuscript indicates that the metric used for “the AMOC strength” is defined as the maximum meridional volume transport between 30°N and 90°N at depths below 500 m. Additionally, we have included triangles to represent the atmospheric pCO<sub>2</sub> calculated in K21.

Fig. 2: The “PI\_sed” and “LGM\_all” simulations could be (briefly) described in the legend so that the reader knows in which way they differ from the transient run initial state without having to look for the simulation description in the 2021 paper.

We have added the experimental information of PI\_sed and LGM\_all to the legend of Fig. 2.

Fig. 3: Please specify which ocean basin is where on the plots (Atl = left, Pac = right).

We have added ”ATL” and ”PAC” to indicate the Atlantic Basin on the left and the Pacific Basin on the right side of the plots.

Fig. 4: The colorbar seems to saturate for very negative  $\delta^{13}\text{C}$  values in marine core data. Also, the contour interval is too dark and narrow to see to subsurface values. A few adjustments (and larger plots) could improve visibility.

We have modified the range of the contour lines, limiting them to exclude contours at data values below the minimum value or above the maximum value. This change improves the visibility of the figure.

Fig. 3 and 4: Please consider calculating the RMSE for both proxies and all periods.

We have calculated the correlation coefficient and RMSE for both proxies across all periods and added the information to Figs. 3 and 4.

Fig. 5: The thin gray line is not very visible on all panels. I would suggest finding an adjustment (e.g. lowering opacity for superimposed curves) to improve visibility.

To improve visibility, we have adjusted the image by changing the opacity of the overlaid lines.

### Technical comments:

L2: “the effects” on what? Please specify.

We have revised the entire abstract and changed this wording.

L6: Introduce “(BA)” abbreviation here.

We have introduced the abbreviation “(BA)” at the point at which it is first used.

L10: “Meanwhile” or “in the meantime” L26: “has transitioned” → “transitioned”

We have revised this wording.

L43: typo “infer”

We have revised this wording.

L52: “those” → “the”

We have revised this wording.

L119: “ocean biogeochemical cycle” → add “carbon”

We have revised this wording.

L230: “of” → “the”

We have revised this wording.

L234: “those” → “the”

We have revised this wording.

L292: “almost completely” → drastically (or synonyms)

We have revised this wording.

L317: Add “... to several factors. First, ...”; L319: “Moreover” → “Second”

We have added these transitional words.

L359: “are synchronized”

We have revised this wording.

L390: typo “lowering”

We have revised this wording.

L397: plural “developments”

We have revised this wording.

L436: “what” → “which”

We have revised this wording.

Most figures, especially Fig. 3 and 4, would gain to be larger.

The figures have been revised and enlarged to improve visibility.
